# Supplementary material
Source: PubMed Central journal article supplement (PMC434425)
Supplement: nar_32_10_3108__1.pdf [file nar_32_10_3108__1.pdf]

## Supplementary material

### Supplementary table 1

Phylogenetic extent of disease protein set versus 10000 random sets of the same size.

| Phylogenetic extent | Number of Disease proteins | Average number of proteins in random sets | Z score | p-value |
|---------------------|----------------------------|-------------------------------------------|---------|---------|
| --B---ILM           | 48                         | 17                                        | 7.91    | <1e-04  |
| -AB-PFILM           | 29                         | 8                                         | 7.79    | <1e-04  |
| --B--FILM           | 28                         | 8                                         | 7.03    | <1e-04  |
| --B-PFILM           | 20                         | 6                                         | 5.50    | <1e-04  |
| -----ILM            | 175                        | 112                                       | 6.11    | <1e-04  |
| -ABTPFI-M           | 74                         | 43                                        | 5.07    | <1e-04  |
| -ABTPFILM           | 112                        | 65                                        | 6.08    | <1e-04  |
| -----LM             | 88                         | 52                                        | 4.99    | <1e-04  |
| -AB--FI-M           | 13                         | 5                                         | 3.69    | 1.3e-03 |
| --B-PFI-M           | 22                         | 13                                        | 2.33    | 0.02    |
| -----I-M            | 89                         | 136                                       | -4.44   | 1e-04   |
| -----M              | 132                        | 221                                       | -6.68   | 1e-04   |
| -----               | 11                         | 181                                       | -13.75  | <1e-04  |

V: Viruses, A: Archaea, B: Bacteria, T: Protista, P: Plants, F: Fungi, I: Invertebrates, L: Vertebrates no mammals, M: Mammals

### Supplementary table 2

Statistical analysis of phylogenetic extent of disease genes using only fully sequenced genomes; 15 Archaea, 61 Bacteria, 2 Fungi (*S. Cerevisiae*, *S. Pombe*), 1 Plants (*A. Thaliana*) and 2 Metazoa (*D. melanogaster*, *C. Elegans*)

|          | Phylogenetic extent |         |
|----------|---------------------|---------|
|          | Z score             | P-value |
| Archaea  | 14.3                | <1e-04  |
| Bacteria | 15.3                | <1e-04  |
| Fungi    | 4.2                 | <1e-04  |
| Plants   | 3.7                 | <1e-04  |
| Metazoa  | 13.7                | <1e-04  |

Z score of number of proteins conserved in each taxonomic group between 10000 random sets and disease set [ $Z_x = (X - \bar{\mu}_x) / \sigma_x$ ] and p-value [ $p_x = \sum(n_x > X) / N$ ]

## Supplementary figure 1

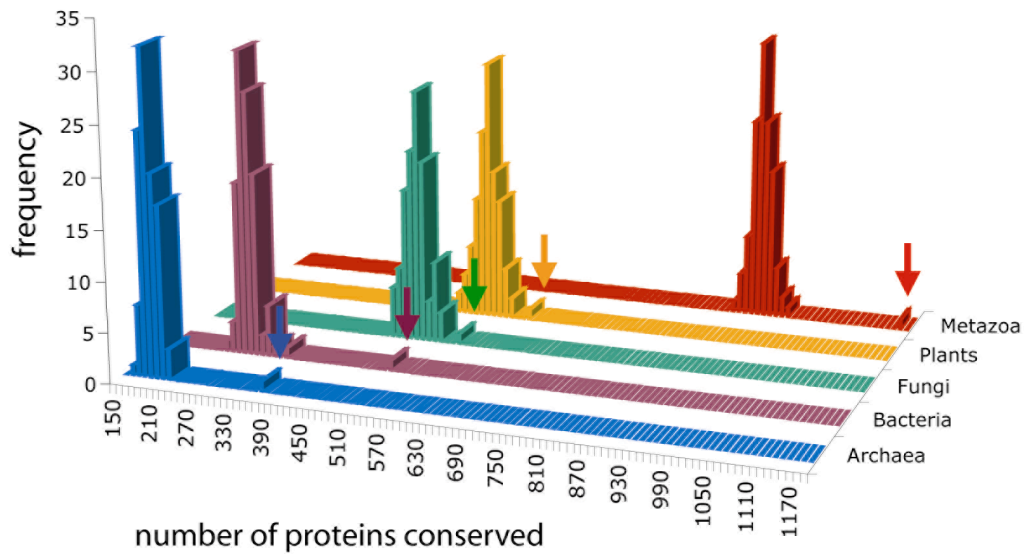

**Fig 1.** Phylogenetic extent of human disease proteins using complete genomes. Frequency distributions of disease proteins (bars indicated by vertical arrows) with homologs in fully sequenced genomes of Archaea (15 genomes), Bacteria (61 genomes), Fungi (*S. cerevisiae* and *S. pombe*), Plants (*A. thaliana*) and Metazoa (*C. elegans* and *D. melanogaster*), versus 100 control sets of equal size containing randomly selected human proteins. Number of proteins with homologs (from a maximum of 1567) is shown in the x-axis and the frequency of the sets on the y-axis.

## Supplementary figure 2

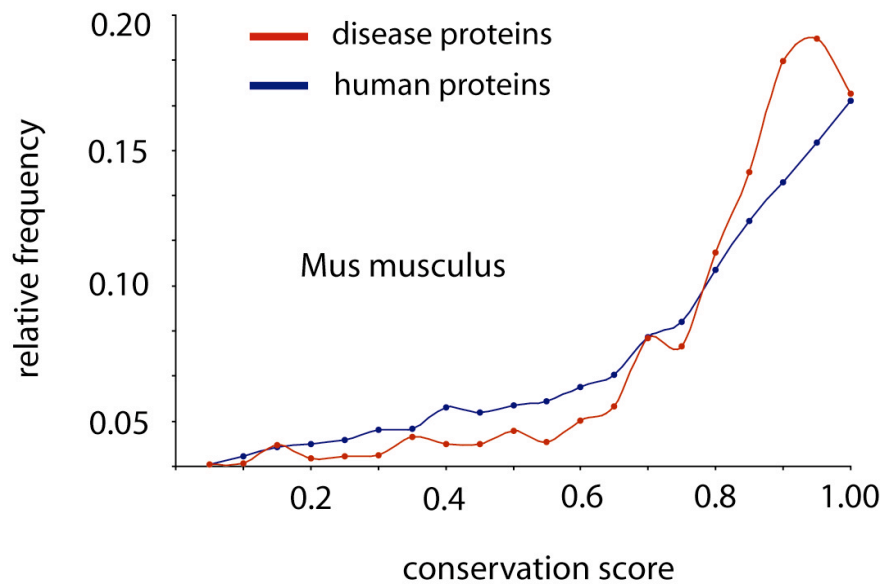

**Fig 2.** Conservation of disease proteins in *M. musculus* complete genome. Distribution of conservation score of disease (red line) and all human proteins (blue line) in *M. musculus*. The conservation score gives an estimation of the mutation rate that the protein has been subjected to during evolution that is independent of the length of the protein: it is calculated as the BLAST score of the closest homolog in one taxonomic group divided by the BLAST score of the protein against itself, ranging from 0 to 1 (when the closest homolog is 100% identical). The maximum distance (D) between the two distributions (Kolmogorov-Smirnov test) is 13.74 and the P-value is  $<2.2e-16$ .
